# Supplementary material for: Molecular clocks, biogeography and species diversity in Herichthys with evaluation of the role of Punta del Morro as a vicariant brake along the Mexican Transition Zone in the context of local and global time frame of cichlid diversification
Source: PeerJ journal article supplement (doi:10.7717/peerj.8818), 2020-04-29
Supplement: Supplemental_material_Figure_S1.pdf [file Supplemental_material_Figure_S1.pdf]

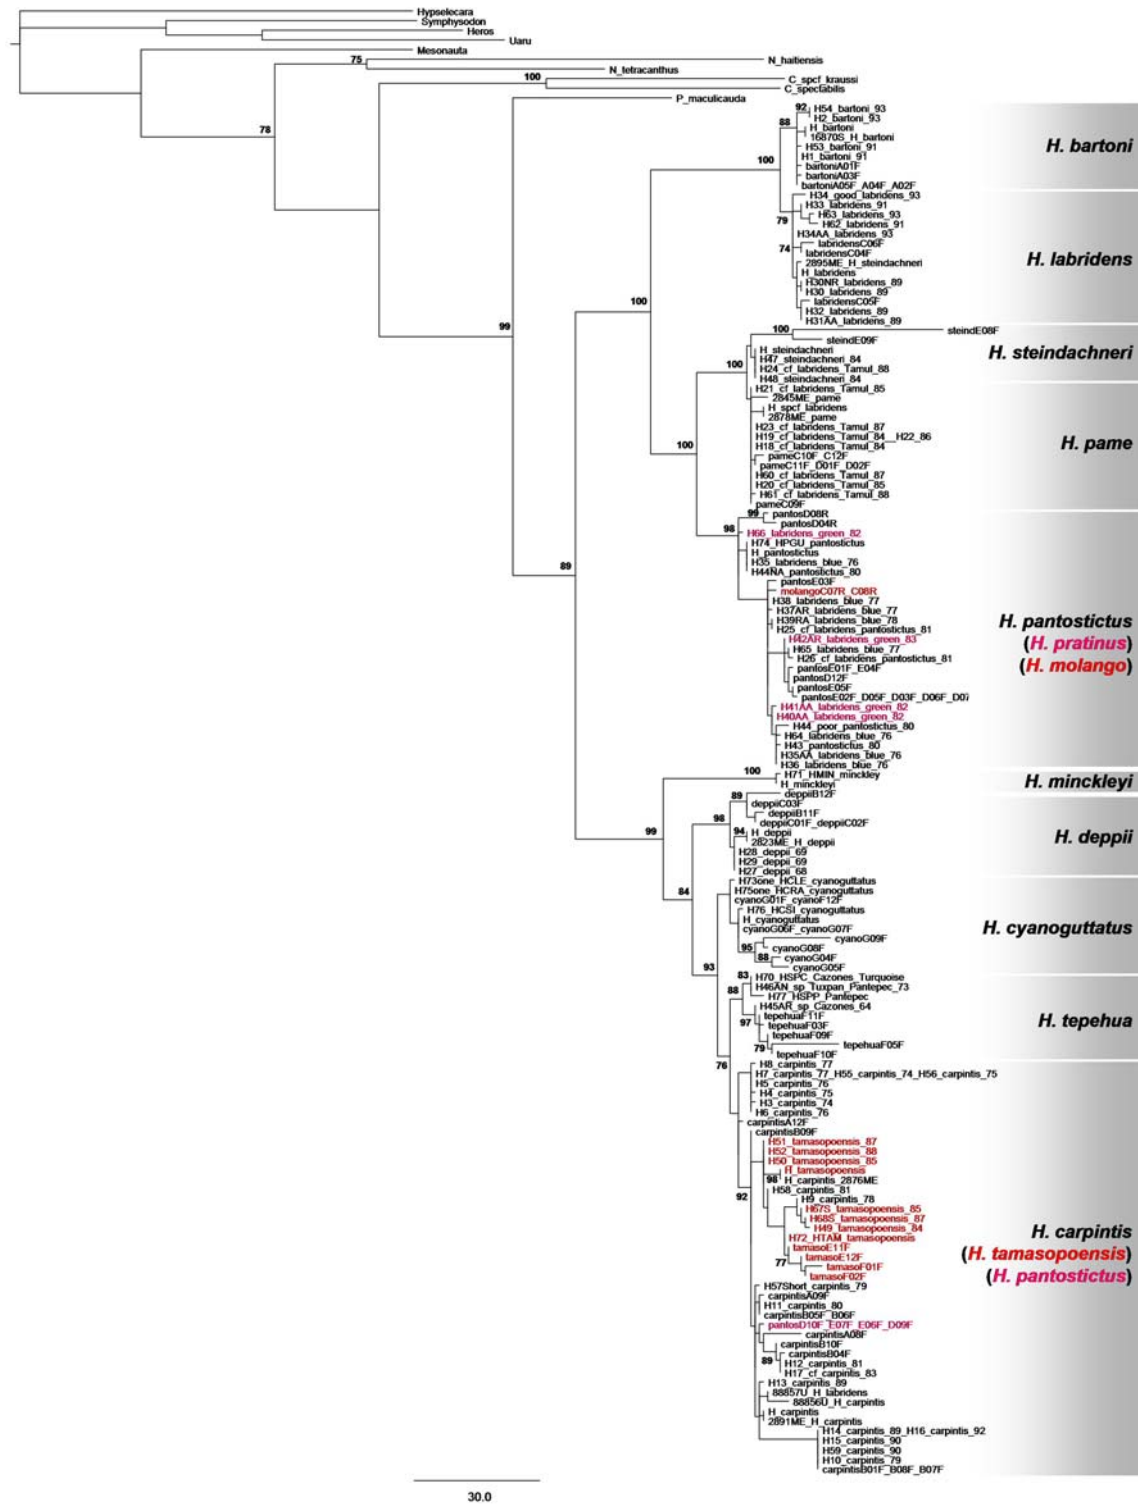

### Supplemental material Fig. S1

Neighbour joining topology of the cytb *Herichthys* haplotype dataset including outgroup taxa. Node support values are from maximum parsimony bootstrap analysis (only values above 70% are shown).
